# Supplementary material for: Removal of Au3+ and Ag+ from aqueous media with magnetic nanoparticles functionalized with squaramide derivatives
Source: PubMed Central journal article supplement — RSC Adv. 2018 Oct 23;8(63):36123–32. doi: 10.1039/c8ra07793b (PMC9088706; doi:10.1039/c8ra07793b), 2018-10-23
Supplement: RA-008-C8RA07793B-s001.pdf [file RA-008-C8RA07793B-s001.pdf]

## Supporting Information

### Removal of $\text{Au}^{3+}$ and $\text{Ag}^+$ from aqueous media with Magnetic Nanoparticles functionalized with squaramide derivatives

Paulino Duel, M. Susana Gutiérrez, Paulina Rodríguez, Alberto León, Kenia A. López, Jeroni Morey\* and M. Nieves Piña\*.

#### SEM Microphotographs

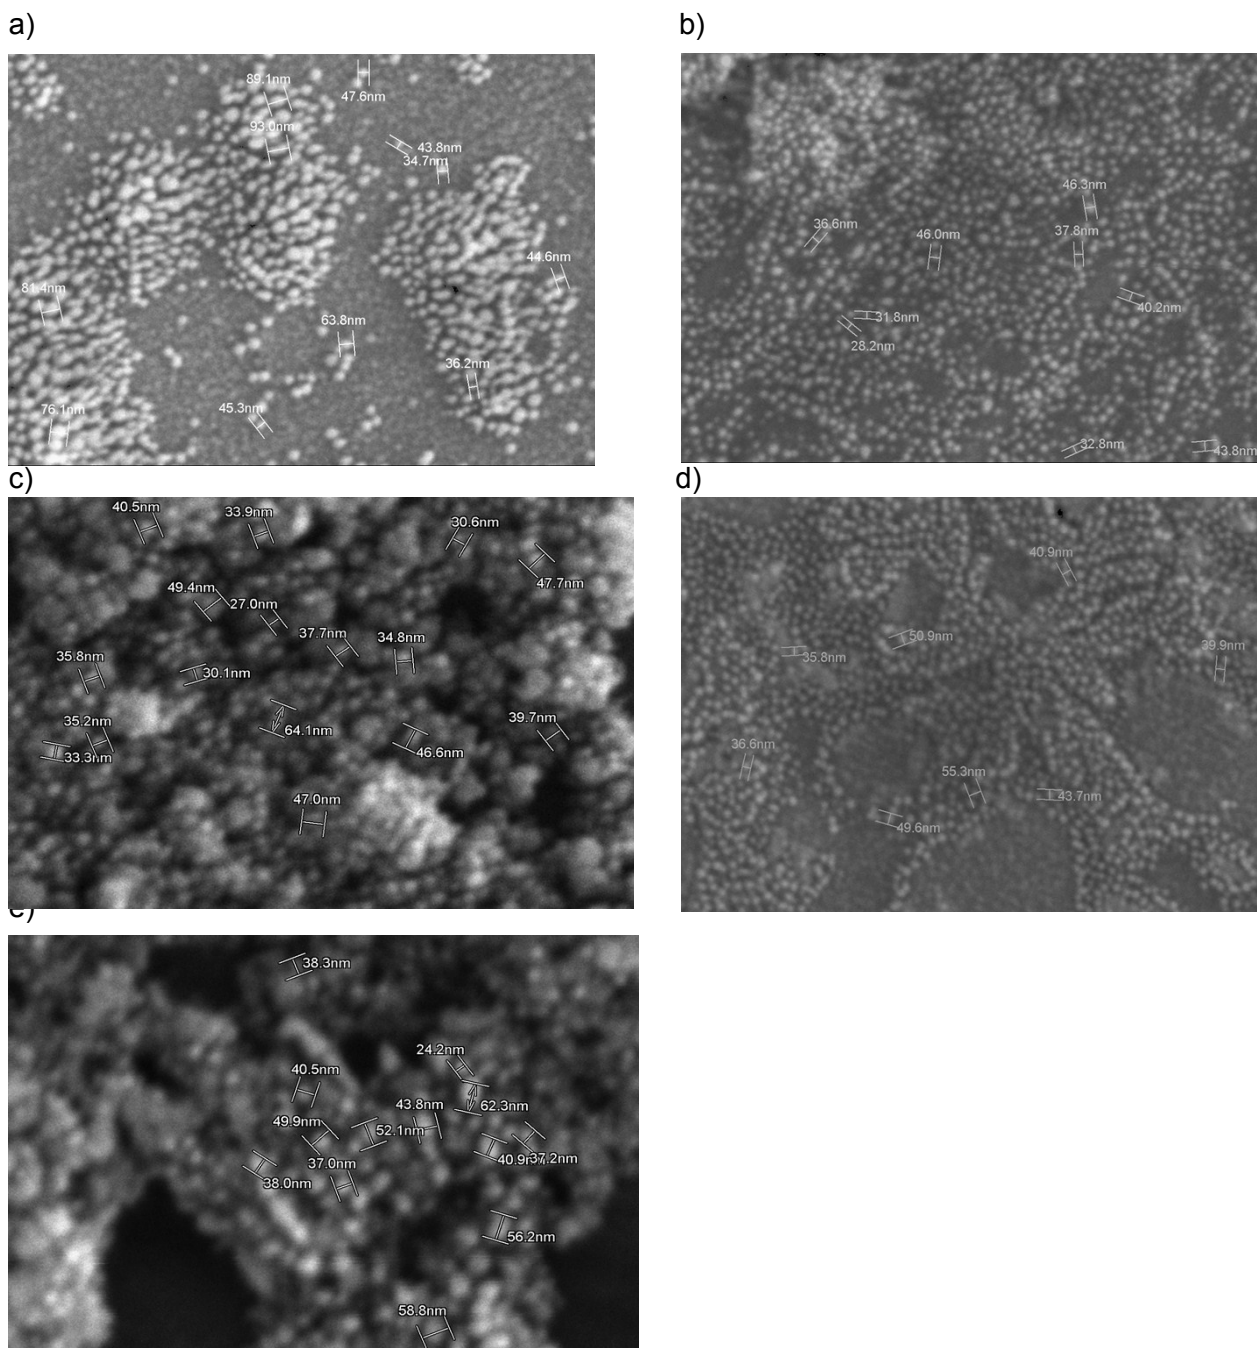

**Figure SI-1A.** SEM microphotographs of: a) FeNP, b) FeNP-SQ1, c) FeNP-SQ2, d) FeNP-SQ3, e) FeNP-SQ4.

# Dynamic Light Scattering

a)

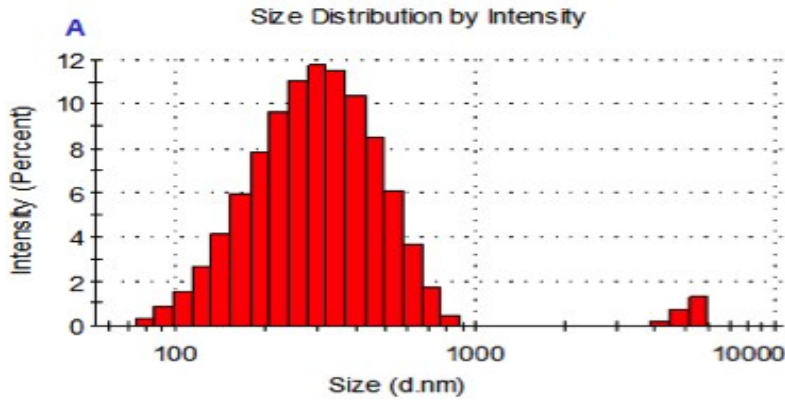

b)

|                                | Size (d.nm):         | % Intensity: | St Dev (d.nm): |
|--------------------------------|----------------------|--------------|----------------|
| <b>Z-Average (d.nm):</b> 229.0 | <b>Peak 1:</b> 297.4 | 89.1         | 141.5          |
| <b>Pdl:</b> 0.378              | <b>Peak 2:</b> 4480  | 5.6          | 889.3          |
| <b>Intercept:</b> 0.922        | <b>Peak 3:</b> 44.69 | 5.3          | 11.96          |
| <b>Result quality : Good</b>   |                      |              |                |

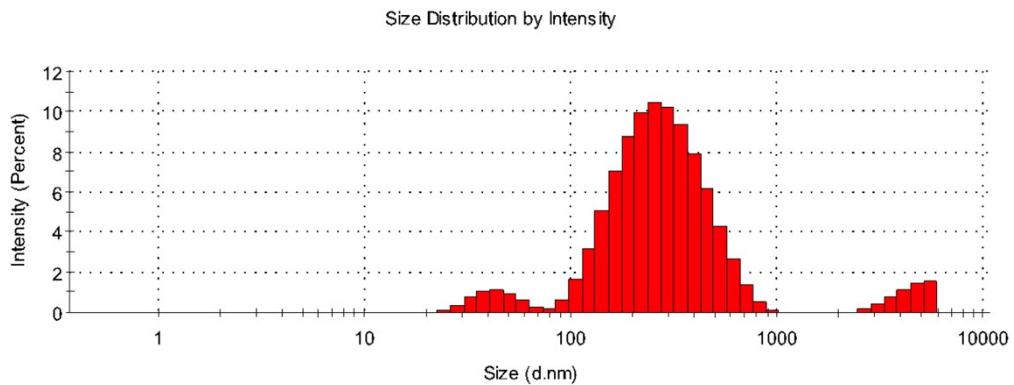

c)

|                                | Size (d.nm...)       | % Intensity: | St Dev (d.nm...) |
|--------------------------------|----------------------|--------------|------------------|
| <b>Z-Average (d.nm):</b> 224.5 | <b>Peak 1:</b> 240.6 | 99.0         | 82.53            |
| <b>Pdl:</b> 0.169              | <b>Peak 2:</b> 4797  | 1.0          | 725.5            |
| <b>Intercept:</b> 0.958        | <b>Peak 3:</b> 0.000 | 0.0          | 0.000            |
| <b>Result quality Good</b>     |                      |              |                  |

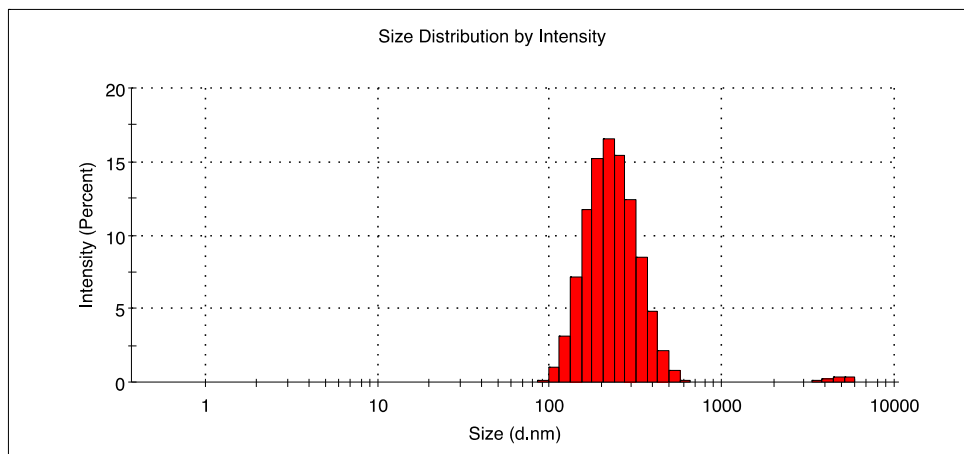

d)

---

|                                    | Size (d.nm):         | % Intensity: | St Dev (d.nm): |
|------------------------------------|----------------------|--------------|----------------|
| <b>Z-Average (d.nm):</b> 255.0     | <b>Peak 1:</b> 427.8 | 100.0        | 484.3          |
| <b>Pdl:</b> 0.258                  | <b>Peak 2:</b> 0.000 | 0.0          | 0.000          |
| <b>Intercept:</b> 0.931            | <b>Peak 3:</b> 0.000 | 0.0          | 0.000          |
| <b>Result quality:</b> <b>Good</b> |                      |              |                |

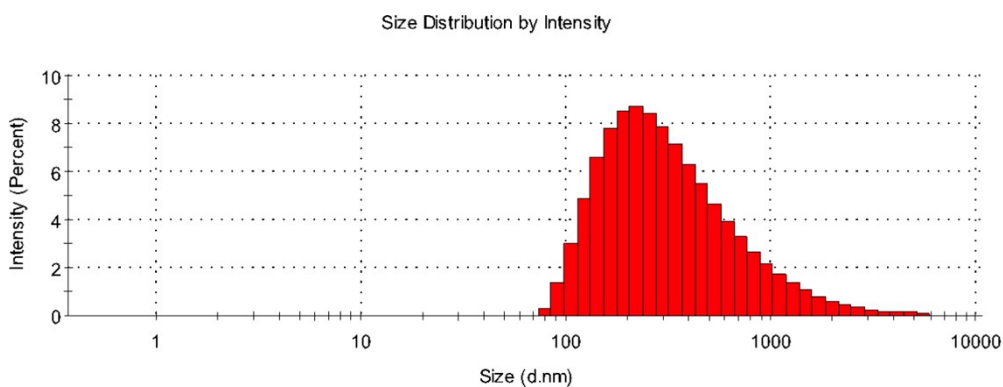

e)

---

|                                    | Size (d.nm):         | % Intensity: | St Dev (d.nm): |
|------------------------------------|----------------------|--------------|----------------|
| <b>Z-Average (d.nm):</b> 321.9     | <b>Peak 1:</b> 392.2 | 96.3         | 181.2          |
| <b>Pdl:</b> 0.266                  | <b>Peak 2:</b> 4667  | 3.7          | 798.7          |
| <b>Intercept:</b> 0.944            | <b>Peak 3:</b> 0.000 | 0.0          | 0.000          |
| <b>Result quality:</b> <b>Good</b> |                      |              |                |

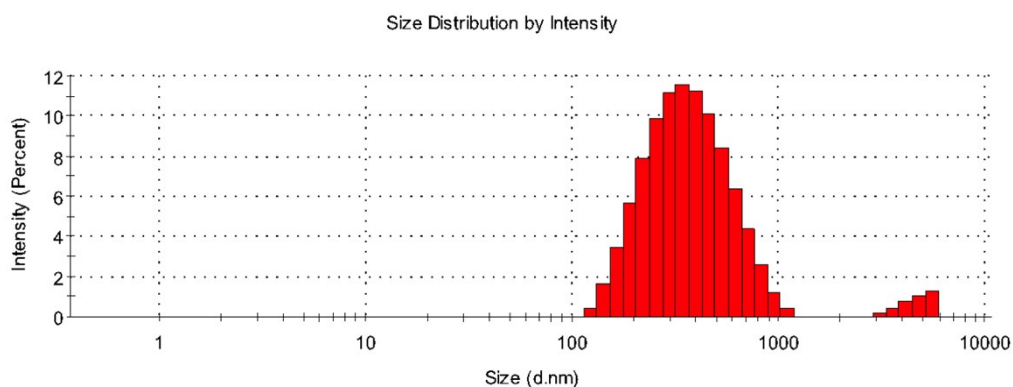

**Figure SI-1B.** DLS in water (pH= 6.5) of: a) FeNP, b) FeNP-SQ1, c) FeNP-SQ2, d) FeNP-SQ3, e) FeNP-SQ4.

## Z-Potential

a)

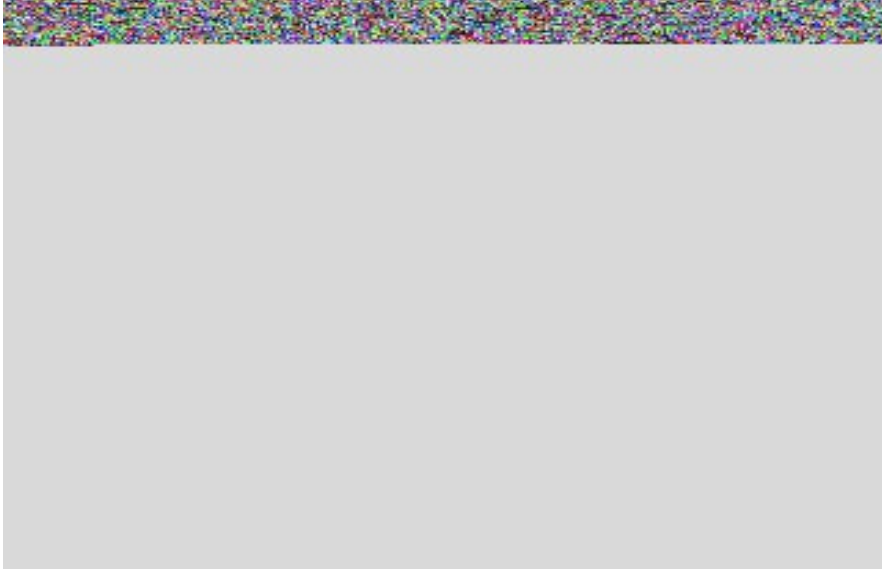

b)

---

|                                    | Mean (mV)            | Area (%) | St Dev (mV) |
|------------------------------------|----------------------|----------|-------------|
| <b>Zeta Potential (mV):</b> -46.0  | <b>Peak 1:</b> -46.0 | 100.0    | 4.62        |
| <b>Zeta Deviation (mV):</b> 4.62   | <b>Peak 2:</b> 0.00  | 0.0      | 0.00        |
| <b>Conductivity (mS/cm):</b> 0.429 | <b>Peak 3:</b> 0.00  | 0.0      | 0.00        |

**Result quality : Good**

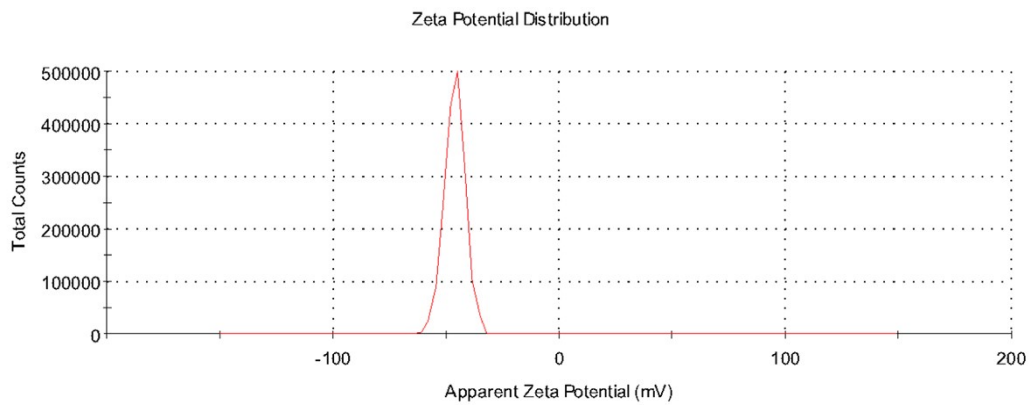

c)

|                                     | Mean (mV)            | Area (%) | St Dev (mV) |
|-------------------------------------|----------------------|----------|-------------|
| <b>Zeta Potential (mV): -29.3</b>   | <b>Peak 1: -29.3</b> | 100.0    | 5.14        |
| <b>Zeta Deviation (mV): 4.87</b>    | <b>Peak 2: 0.00</b>  | 0.0      | 0.00        |
| <b>Conductivity (mS/cm): 0.0103</b> | <b>Peak 3: 0.00</b>  | 0.0      | 0.00        |
| <b>Result quality Good</b>          |                      |          |             |

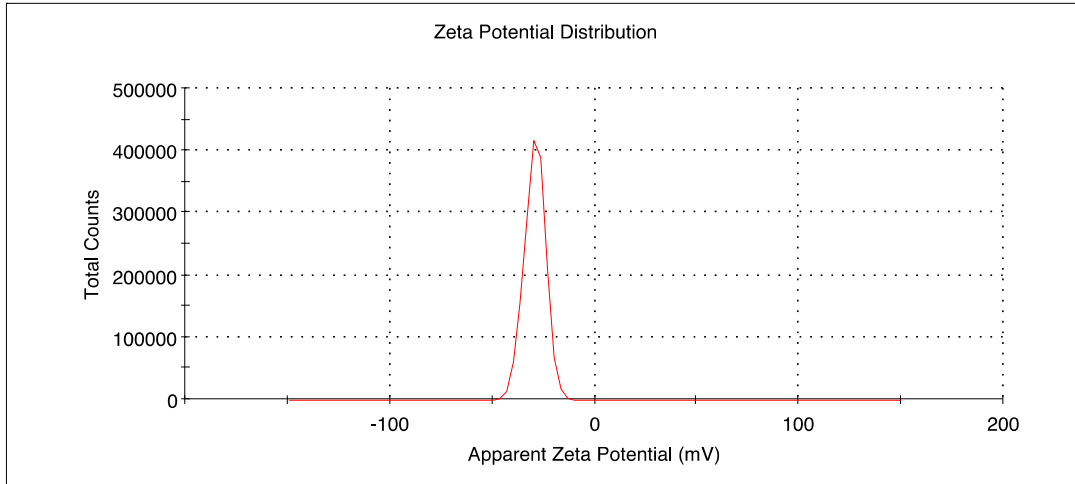

d)

|                                     | Mean (mV)            | Area (%) | St Dev (mV) |
|-------------------------------------|----------------------|----------|-------------|
| <b>Zeta Potential (mV): -28.2</b>   | <b>Peak 1: -28.2</b> | 100.0    | 4.06        |
| <b>Zeta Deviation (mV): 4.06</b>    | <b>Peak 2: 0.00</b>  | 0.0      | 0.00        |
| <b>Conductivity (mS/cm): 0.0197</b> | <b>Peak 3: 0.00</b>  | 0.0      | 0.00        |
| <b>Result quality : Good</b>        |                      |          |             |

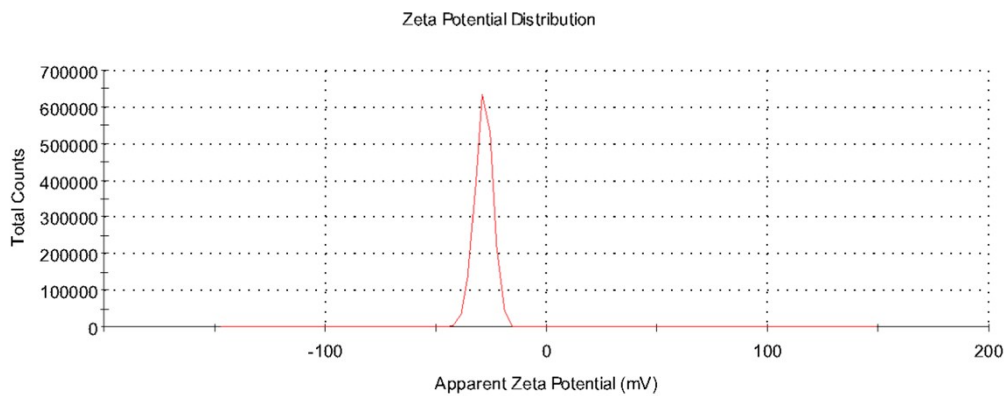

e)

|                                      | Mean (mV)            | Area (%) | St Dev (mV) |
|--------------------------------------|----------------------|----------|-------------|
| <b>Zeta Potential (mV):</b> -22.0    | <b>Peak 1:</b> -22.0 | 100.0    | 3.62        |
| <b>Zeta Deviation (mV):</b> 3.62     | <b>Peak 2:</b> 0.00  | 0.0      | 0.00        |
| <b>Conductivity (mS/cm):</b> 0.00789 | <b>Peak 3:</b> 0.00  | 0.0      | 0.00        |

**Result quality : Good**

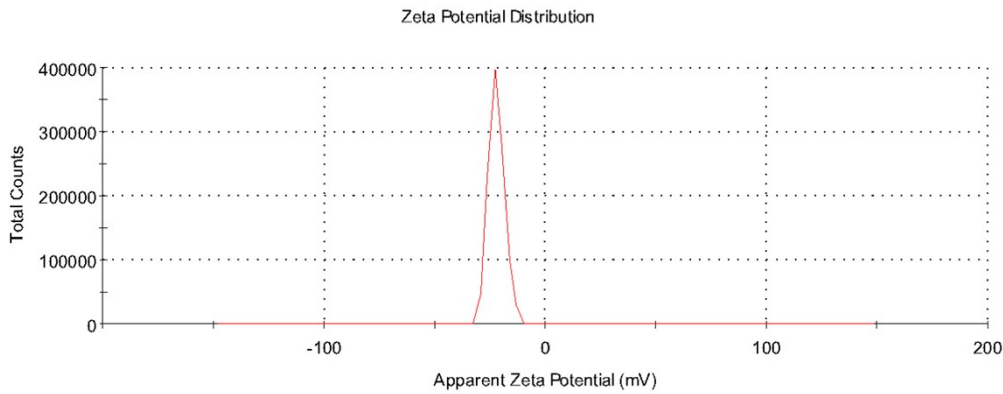

**Figure SI-1C.** Z-potential in water (pH= 6.5) of: a) FeNP, b) FeNP-SQ1, c) FeNP-SQ2, d) FeNP-SQ3, e) FeNP-SQ4.

**FTIR**

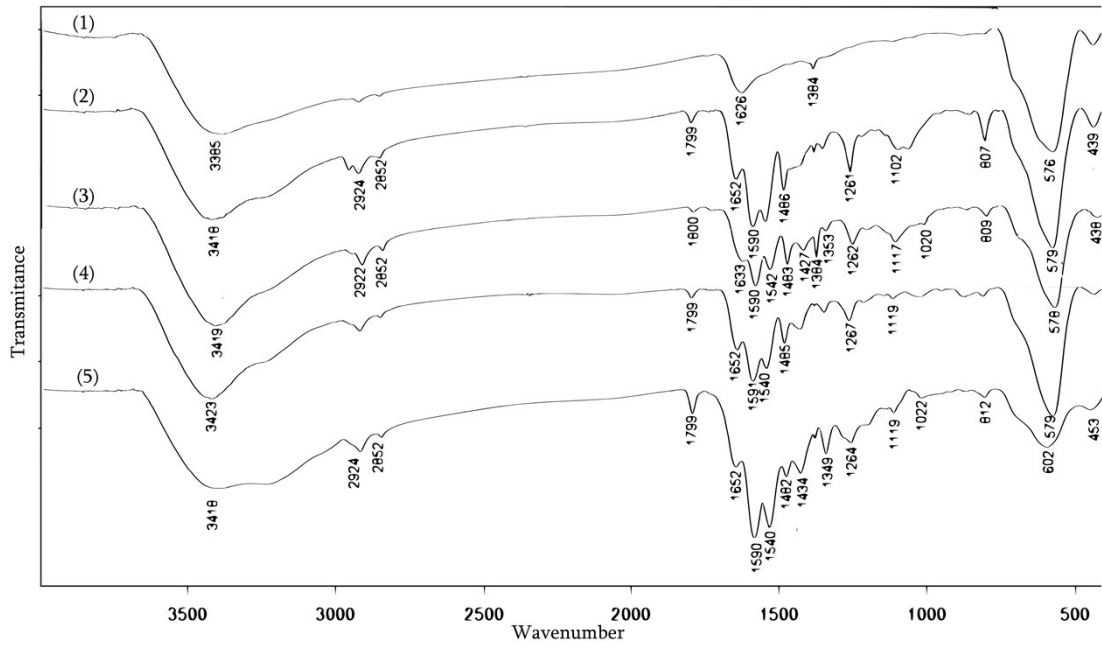

**Figure SI-2.** FTIR in KBr of: a) FeNP, b) FeNP-SQ1, c) FeNP-SQ2, d) FeNP-SQ3, e) FeNP-SQ4.

# Thermogravimetric analysis

a)

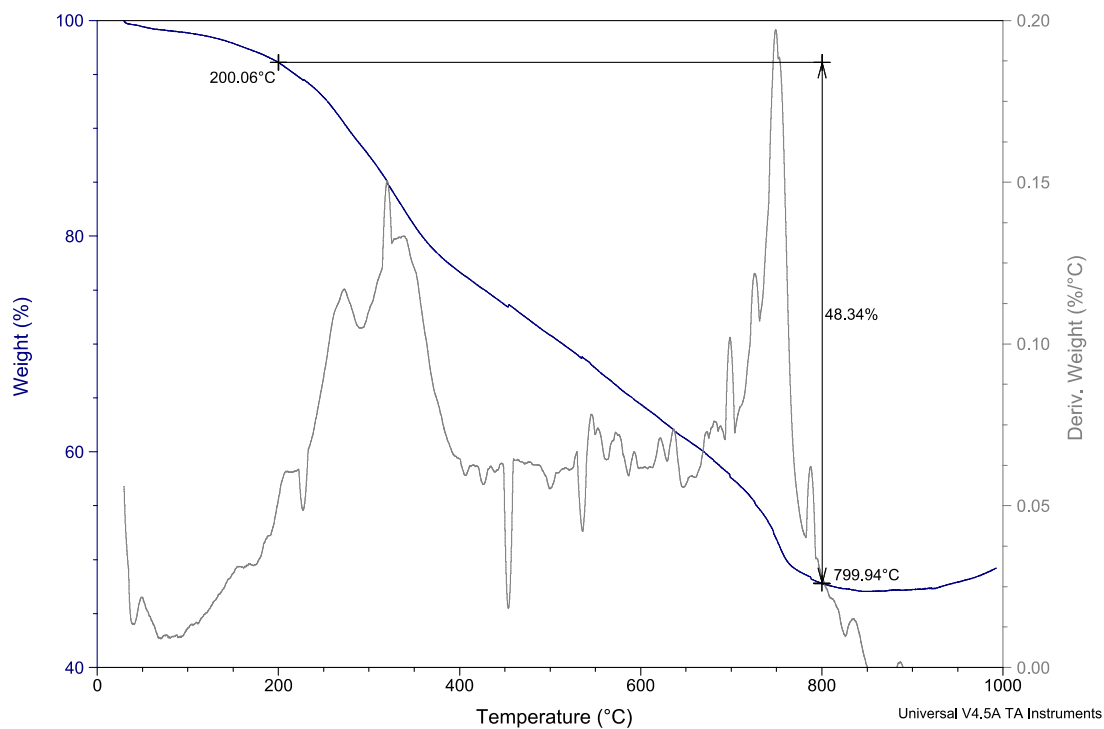

b)

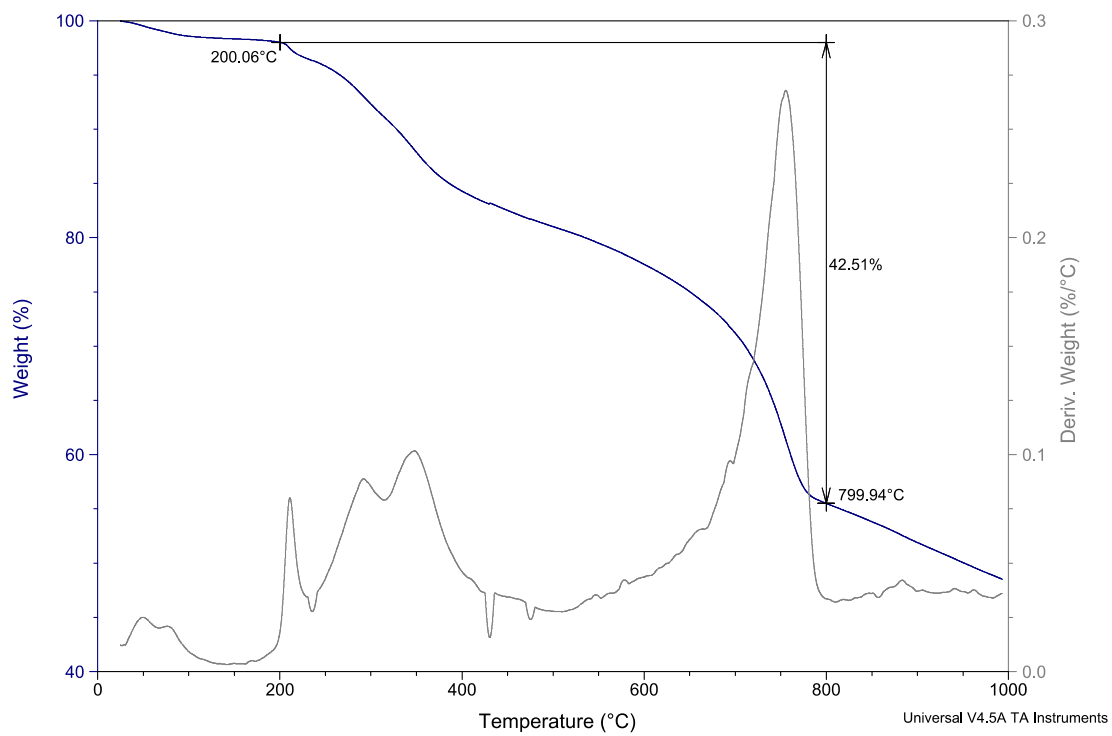

c)

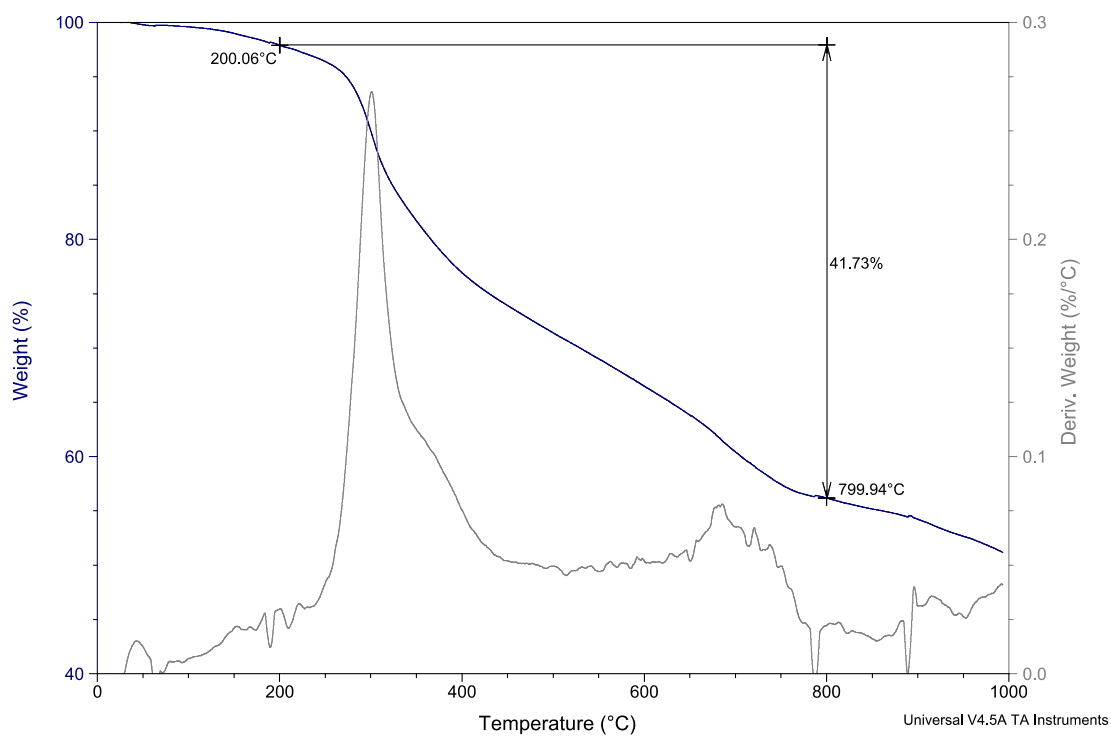

d)

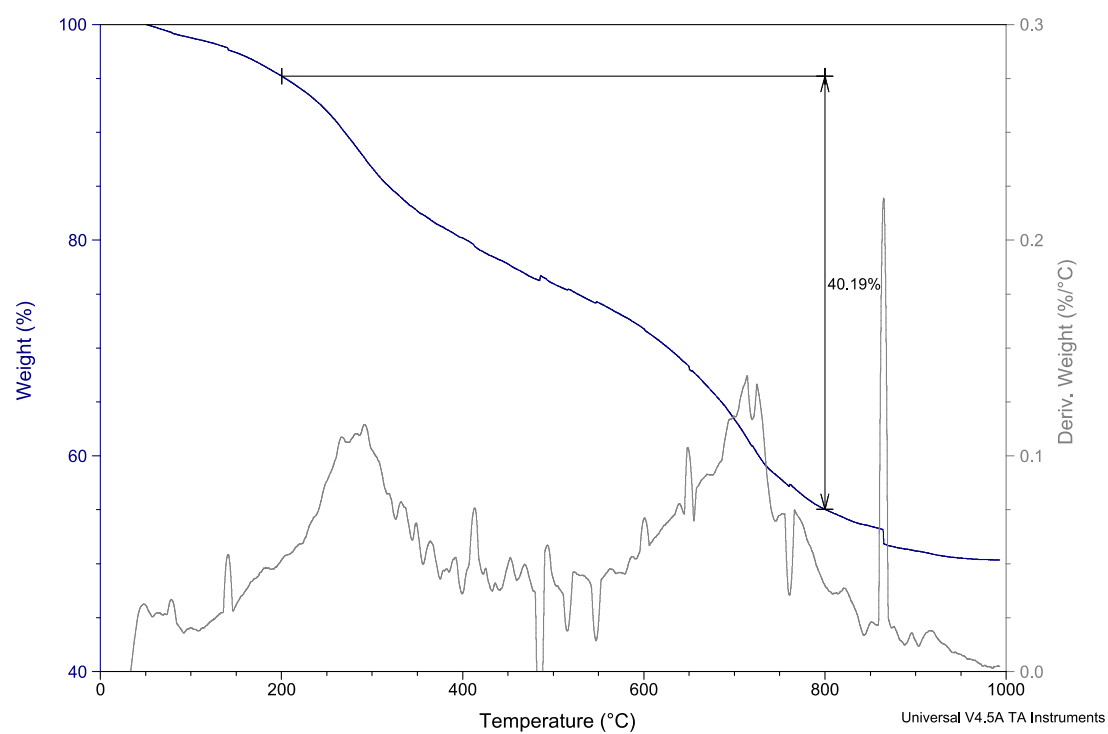

**Figure SI-3.** Thermogravimetric analysis (TGA) of: a) FeNP-SQ1, b) FeNP-SQ2, c) FeNP-SQ3, d) FeNP-SQ4.



### Determination of number of molecules on FeNP-SQs surface.

The Thermogravimetric Analysis (TGA) shows a single weight loss, between 200 and 800 °C. This value is used to determine the total number of molecules on the surface. Applying the following equations, the number of molecules on a FeNP-SQs surface can be determined:

$$N = \frac{\pi D^3 \rho}{6mw}$$
$$\frac{1}{N} = \frac{\text{nanoparticles}}{\text{mol Fe}_3\text{O}_4}$$

Where  $1/N$  refers to the number of FeNP-SQ for each mol of  $\text{Fe}_3\text{O}_4$ .  $D$  is the average diameter of FeNP-SQ in cm (provided by SEM micrographs),  $\rho$  is  $\text{Fe}_3\text{O}_4$  density ( $5.196 \text{ g/cm}^3$ ) and  $mw$  is the molecular weight of  $\text{Fe}_3\text{O}_4$  ( $231.53 \text{ g/mol}$ ). In order to improve and clarify the number of substituents, we chose TGA method to determine conjugation rate against mass loss due to decomposition. Experiments were performed with constant heating rate of  $10 \text{ }^\circ\text{C/min}$  from room temperature ( $25 \text{ }^\circ\text{C}$ ) to  $1000 \text{ }^\circ\text{C}$ . Using weight loss percentage values it is possible to quantify the number of molecules on FeNP-SQ surface applying previous equations.

### RMN

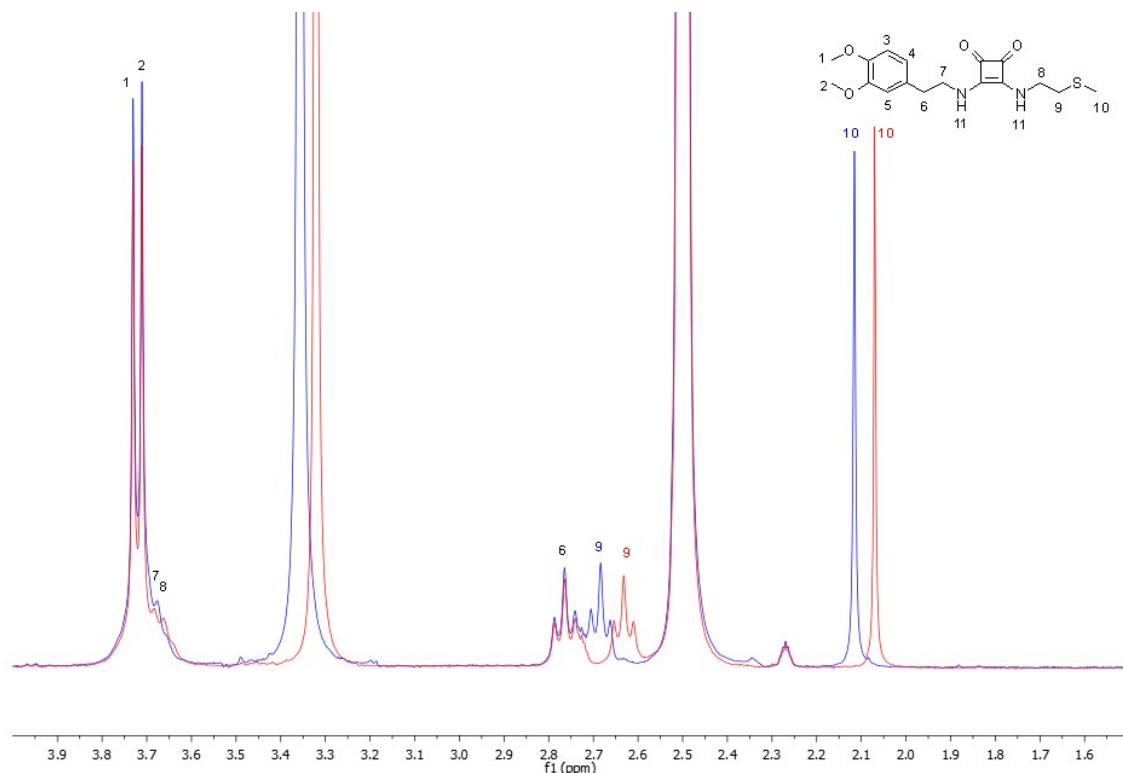

**Figure SI-4A.**  $^1\text{H}$  RMN spectra, in  $\text{DMSO-d}_6$ , of SQ5 before (red) and after (blue) adding 1 equivalent of  $\text{Hg(ClO}_4)_2$ .

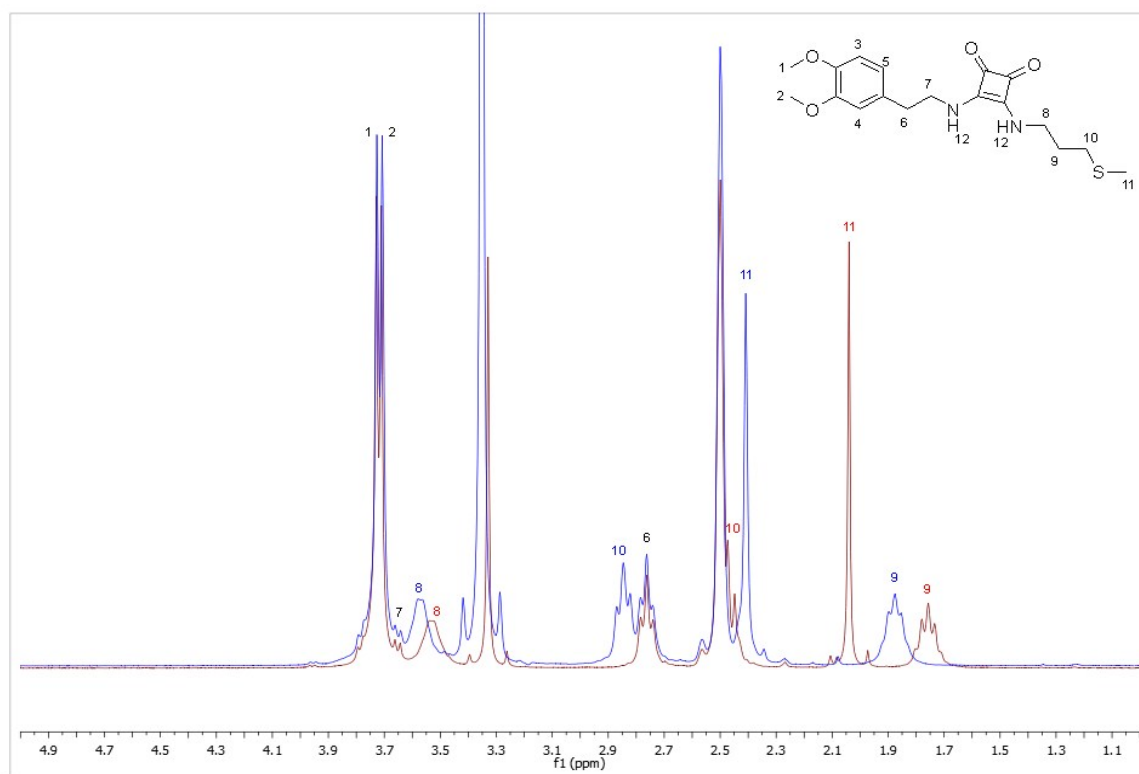

**Figure SI-4B.** <sup>1</sup>H RMN spectra, in DMSO-d<sub>6</sub>, of SQ6 before (red) and after (blue) adding 1 equivalent of Hg(ClO<sub>4</sub>)<sub>2</sub>.

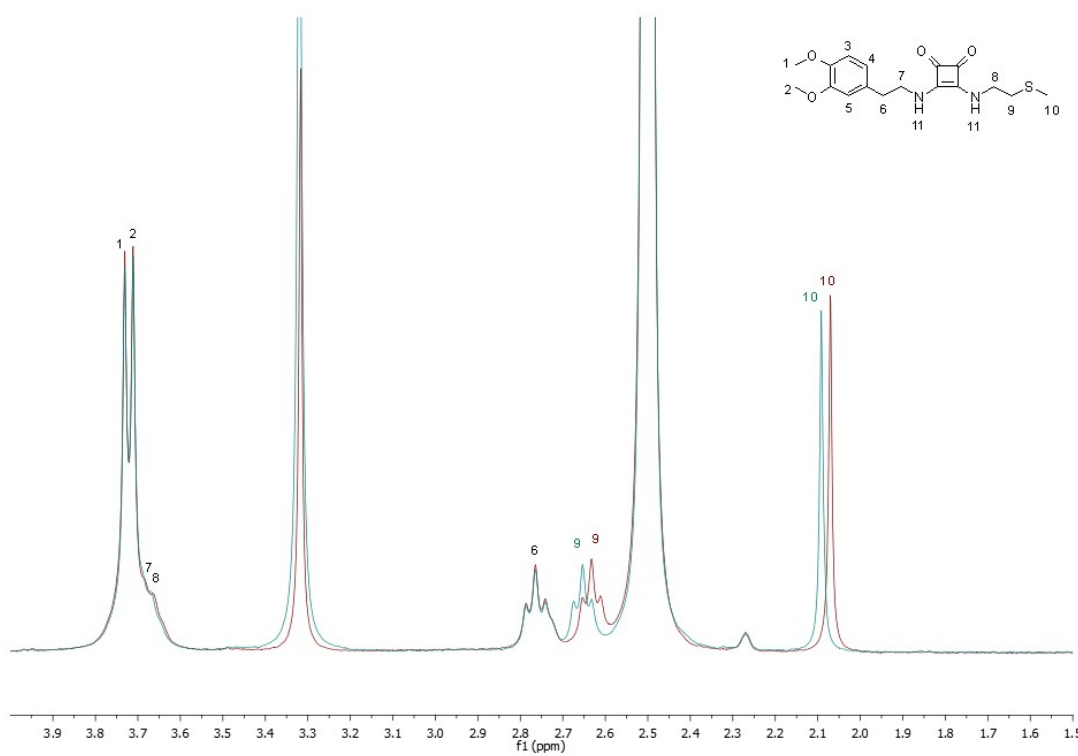

**Figure SI-5A.** <sup>1</sup>H RMN spectra, in DMSO-d<sub>6</sub>, of SQ5 before (red) and after (blue) adding 1 equivalent of AgNO<sub>3</sub>.

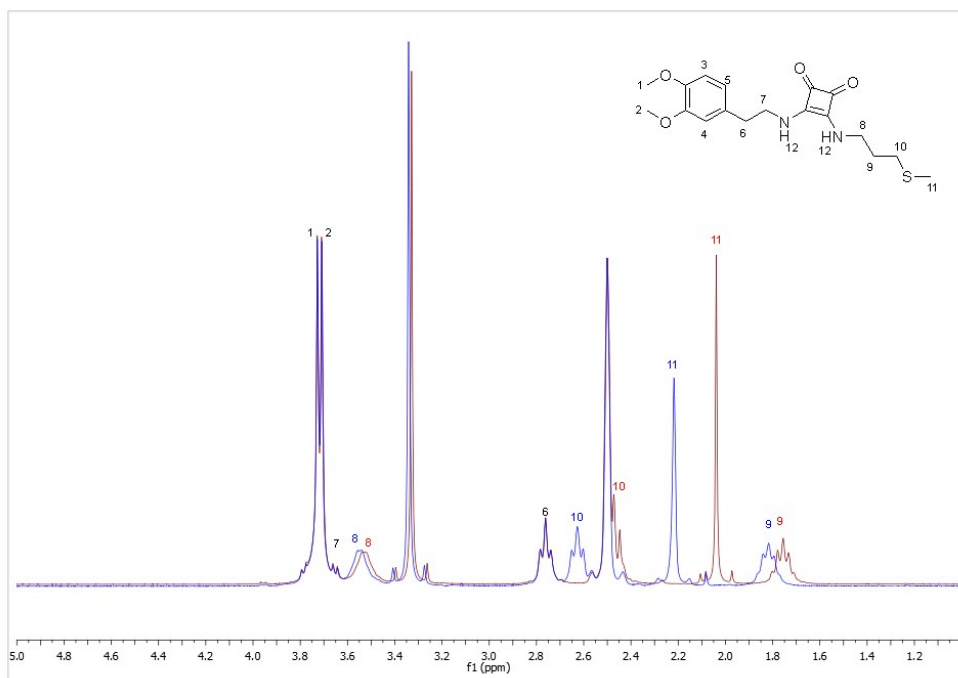

**Figure SI-5B.**  $^1\text{H}$  RMN spectra, in  $\text{DMSO-d}_6$ , of SQ6 before (red) and after (blue) adding 1 equivalent of  $\text{AgNO}_3$ .

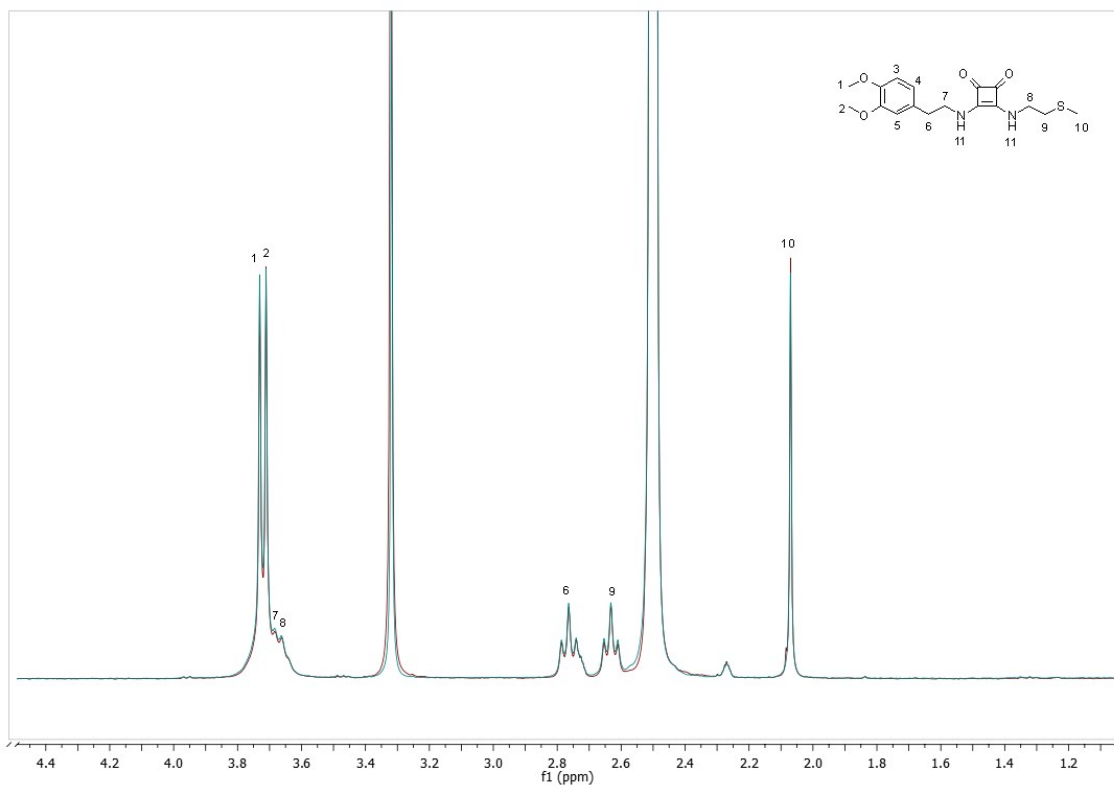

**Figure SI-6A.**  $^1\text{H}$  RMN spectra, in  $\text{DMSO-d}_6$ , of SQ5 before (red) and after (blue) adding 1 equivalent of  $\text{Pb}(\text{ClO}_4)_2$ .

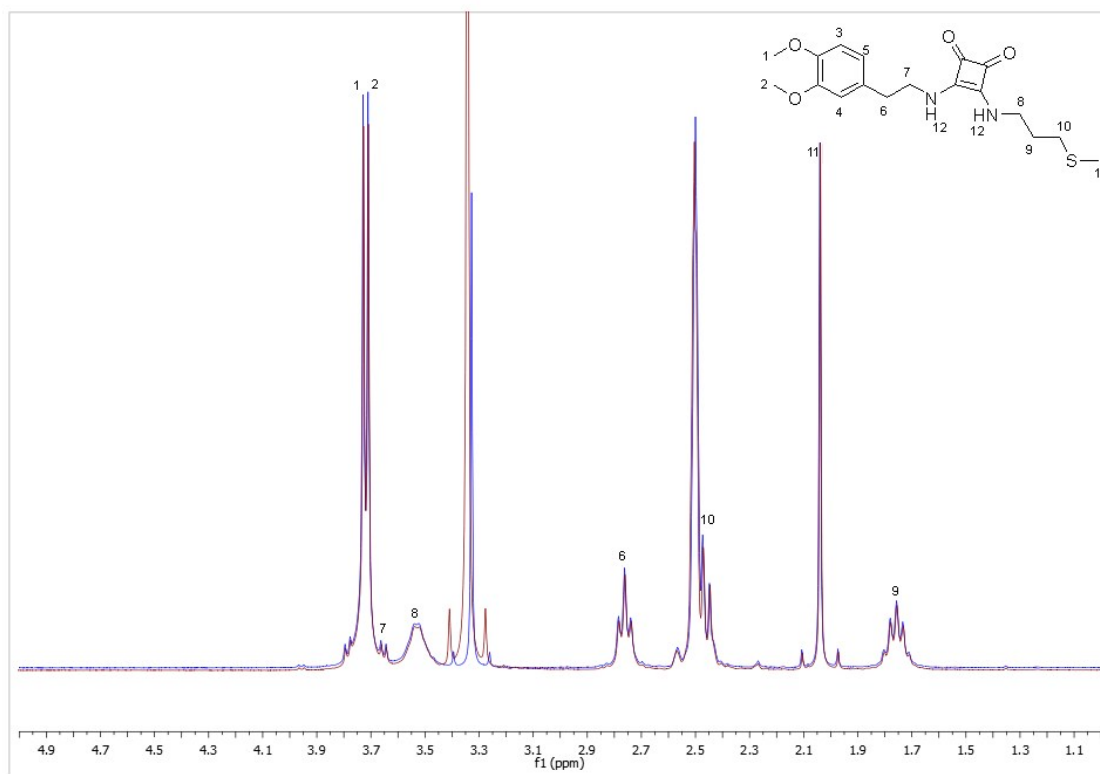

**Figure SI-6B.**  $^1\text{H}$  RMN spectra, in  $\text{DMSO-d}_6$ , of SQ6 before (red) and after (blue) adding 1 equivalent of  $\text{Pb}(\text{ClO}_4)_2$ .

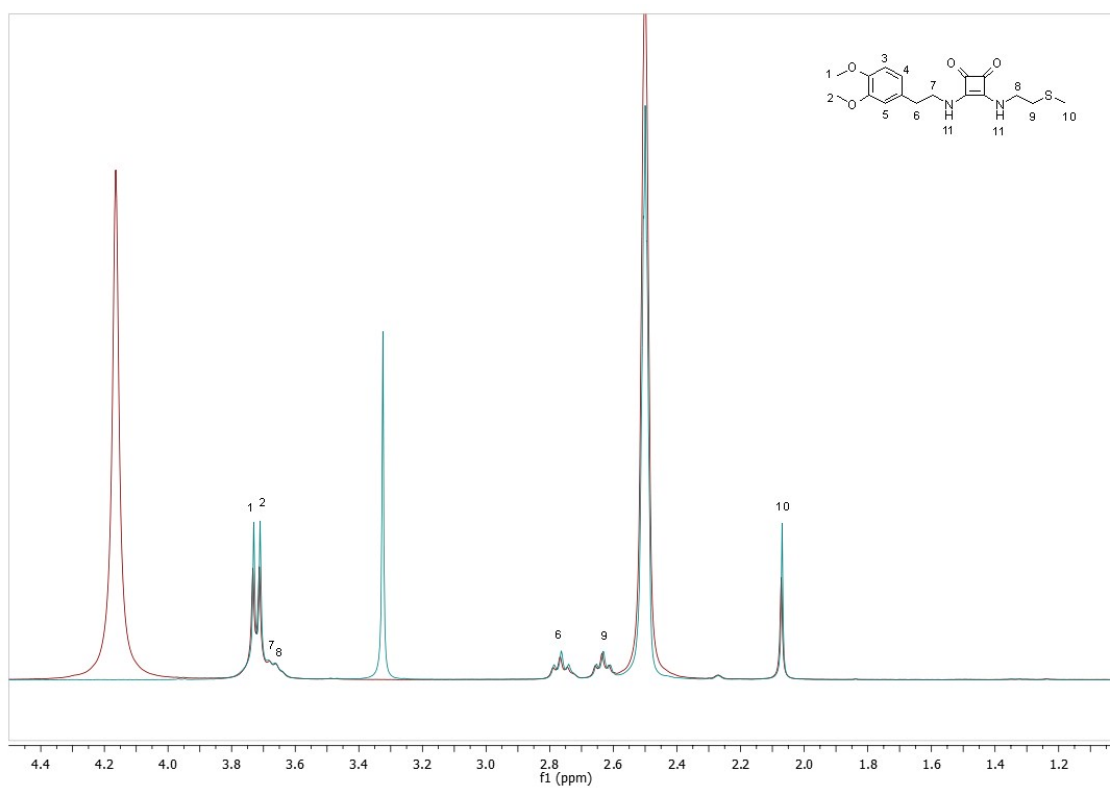

**Figure SI-7A.**  $^1\text{H}$  RMN spectra, in  $\text{DMSO-d}_6$ , of SQ5 before (red) and after (blue) adding 1 equivalent of  $\text{AuCl}_3 \cdot 3\text{H}_2\text{O}$ .

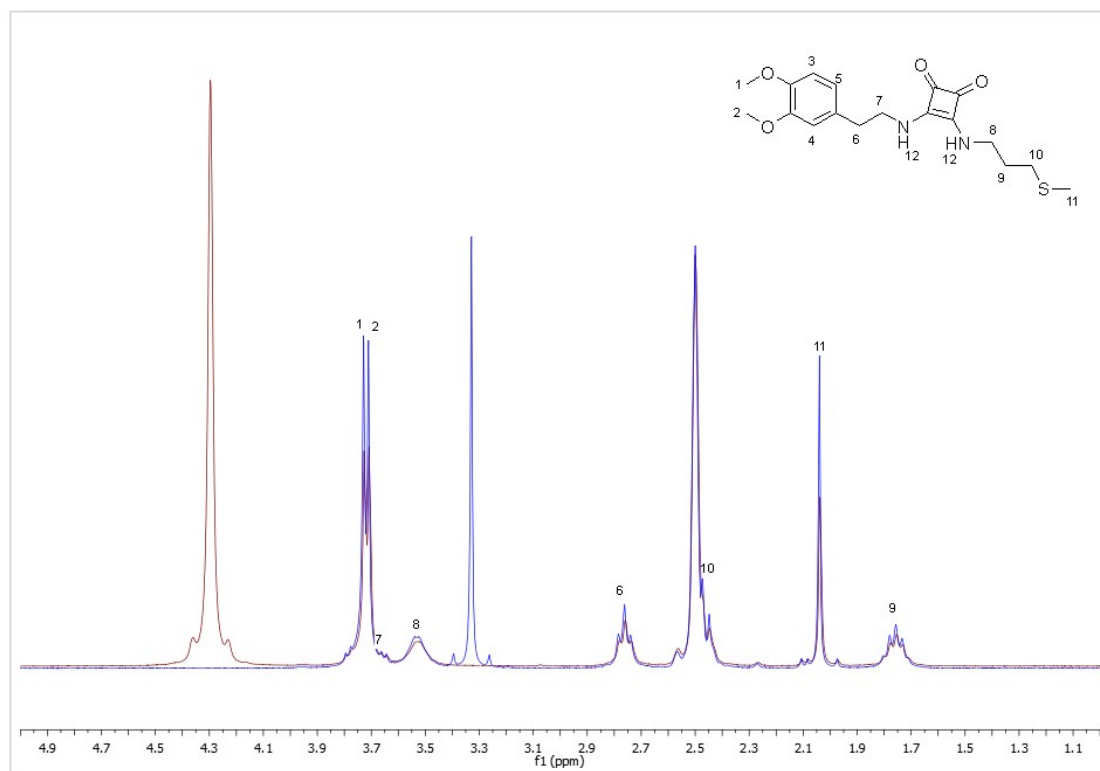

**Figure SI-7B.**  $^1\text{H}$  RMN spectra, in  $\text{DMSO-d}_6$ , of SQ6 before (red) and after (blue) adding 1 equivalent of  $\text{AuCl}_3 \cdot 3\text{H}_2\text{O}$ .

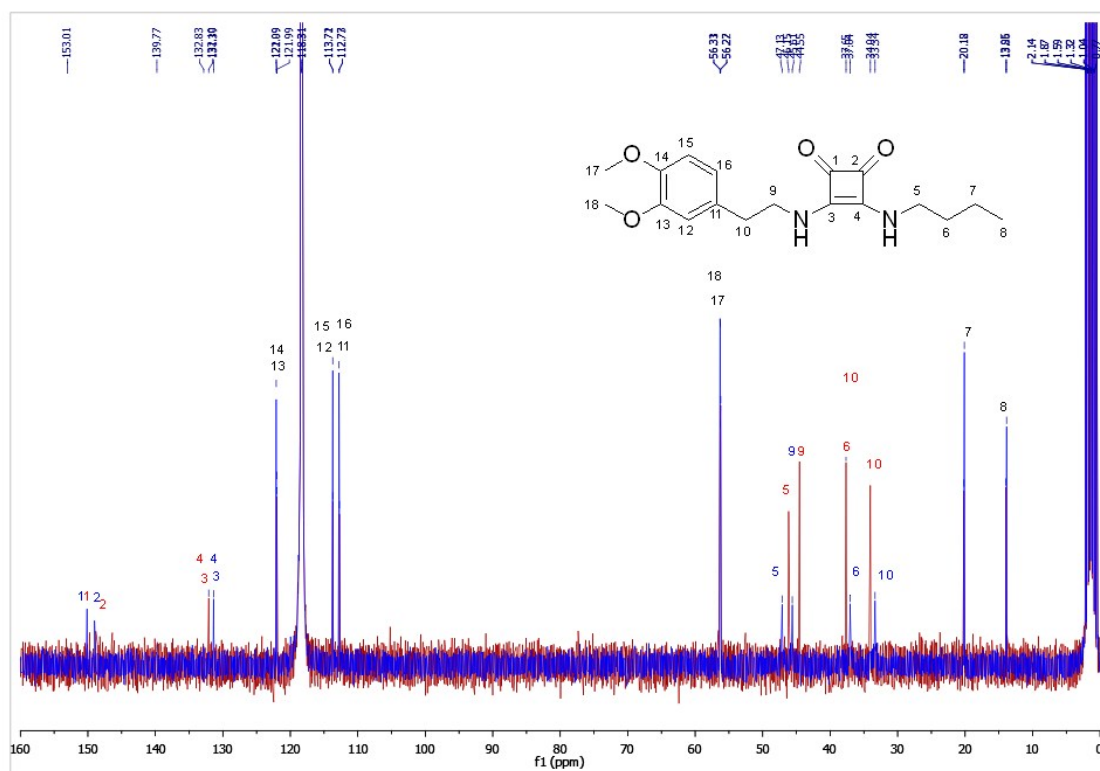

**Figure SI-8**  $^{13}\text{C}$  RMN spectra, in  $\text{CD}_3\text{CN}$ , of 3,4-dimethoxy-SQ1 before (red) and after (blue) adding 1 equivalent of  $\text{AuCl}_3 \cdot 3\text{H}_2\text{O}$ .

## HRMS-ESI

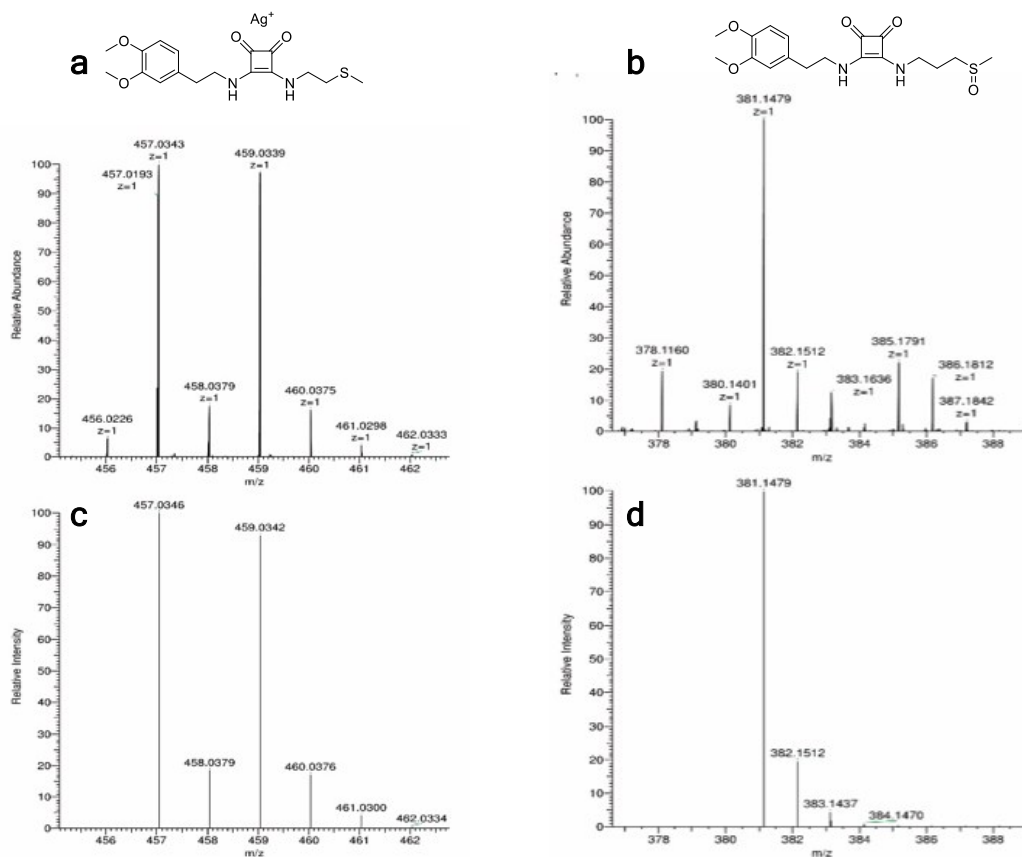

**Figure SI-9A.** a) HRMS-ESI(+) of a  $\text{CH}_3\text{CN}$  solution of SQ5 in presence of  $\text{Ag}^+$ . The signal at  $m/z$  457.0343 corresponds to  $[\text{Ag}\cdot\text{SQ5}]^+$ . c) Calculated isotopic distributions for  $[\text{Ag}\cdot\text{SQ5}]^+$ . b) HRMS-ESI(+) of a  $\text{CH}_3\text{CN}$  solution of SQ6 in presence of  $\text{Au}^{3+}$ . The signal at  $m/z$  341.1479 corresponds to sulfoxide of the starting SQ6. d) Calculated isotopic distributions for SQ6-sulfoxide. Note the excellent correlation between the recorded spectra and the calculated isotopic distributions.

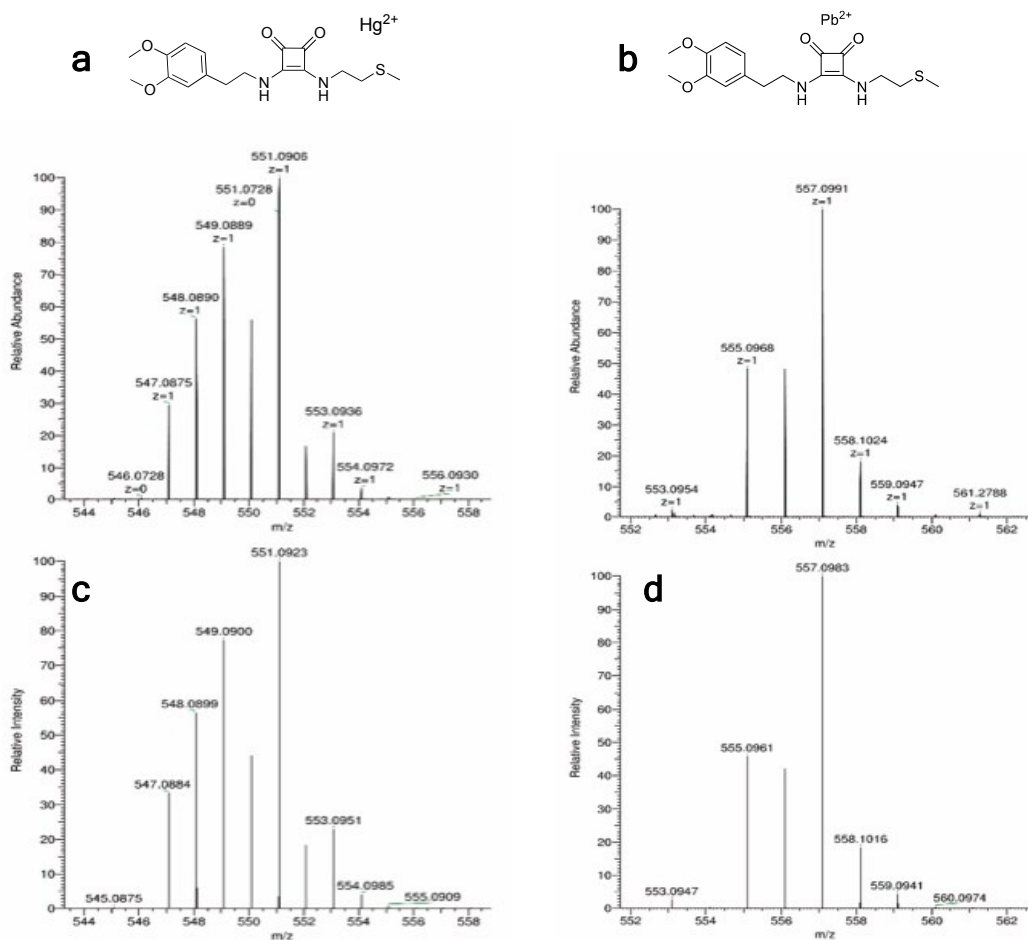

**Figure SI-9B.** a) HRMS-ESI(+) of a  $\text{CH}_3\text{CN}$  solution of SQ5 in presence of  $\text{Hg}^{2+}$ . The signal at  $m/z$  551.0906 corresponds to  $[\text{Hg}\cdot\text{SQ5-H}]^+$ . c) Calculated isotopic distributions for  $[\text{Hg}\cdot\text{SQ5-H}]^+$ . b) HRMS-ESI(+) of a  $\text{CH}_3\text{CN}$  solution of SQ5 in presence of  $\text{Pb}^{2+}$ . The signal at  $m/z$  557.0991 corresponds to  $[\text{Pb}\cdot\text{SQ5-H}]^+$ . d) Calculated isotopic distributions for  $[\text{Pb}\cdot\text{SQ5-H}]^+$ . Note the excellent correlation between the recorded spectra and the calculated isotopic distributions.

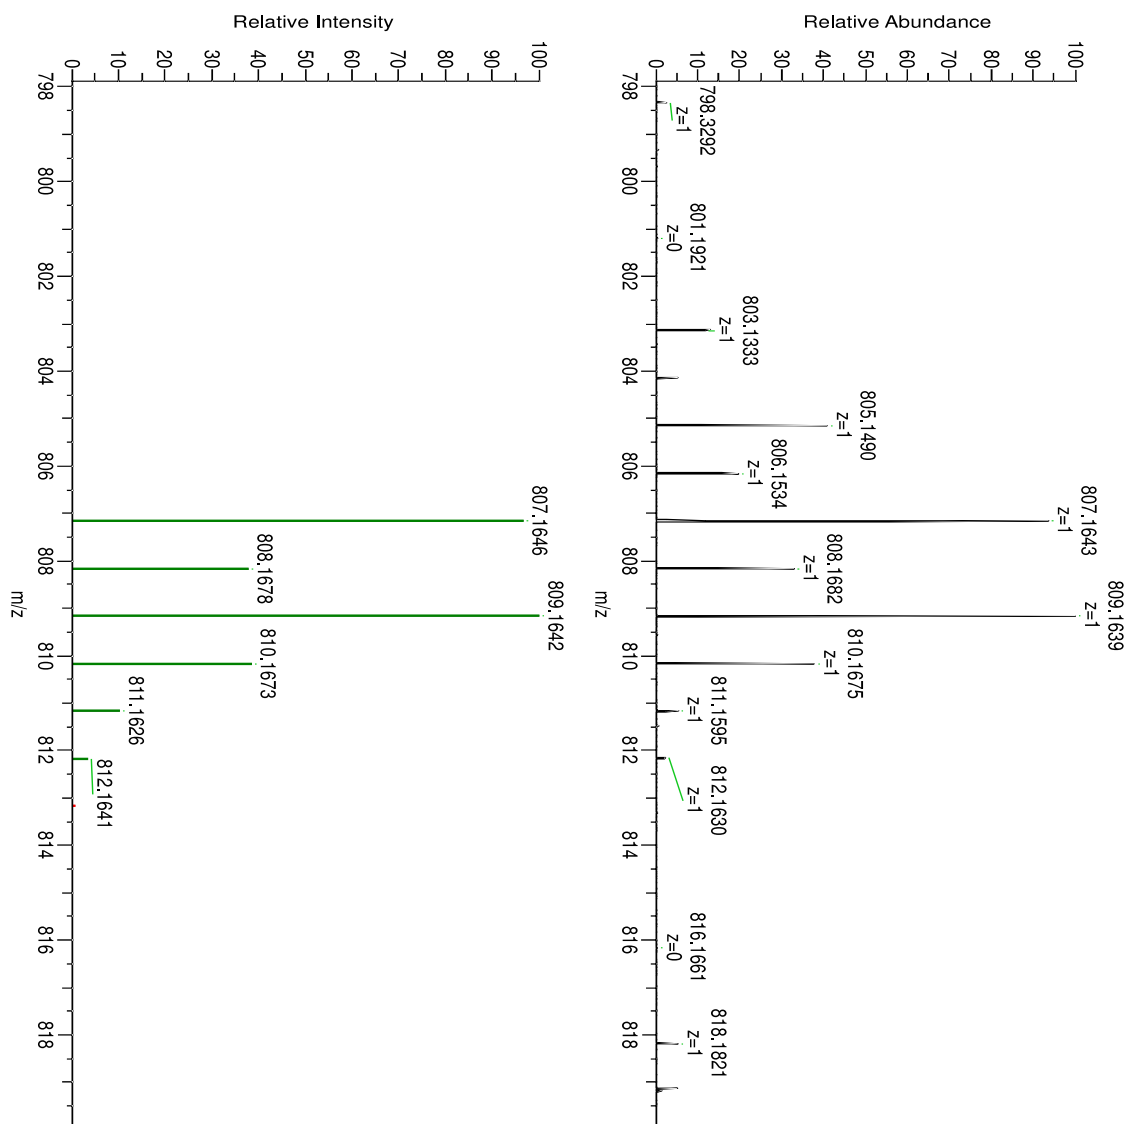

**Figure SI-10.** HRMS-ESI(+) of a CH<sub>3</sub>CN solution of SQ5 in presence of Ag<sup>+</sup>. The signal at m/z 807.1646 corresponds to [Ag·(SQ5)<sub>2</sub>]<sup>+</sup>.

### Removal procedure for each metal

In an illustrative removal procedure 5 mg of the hybrid-functionalized nanoparticles FeNP-SQX were suspended in 10 mL of a metal solution (5 ppm) in a 15 mL falcon tube. The suspension was irradiated with ultrasound for 10 minutes. The mixture was stirred for 2 hours. After that, the magnetic nanoparticles were isolated by magnetic filtration. The remaining solution was filtered by 0.45 μm Teflon filter and 2 mL of this solution was diluted with HNO<sub>3</sub> 2.5% to a total of 10 mL to analyse by ICP-OES metal concentration remaining.
